# Supplementary material
Source: publisher figshare collection journal article supplement (https://acs.figshare.com/ndownloader/files/10764694)
Supplement: Supplementary file 1 [file 10764694]

## Supporting Information

### **ALD-Developed Plasmonic Two-Dimensional Au-WO<sub>3</sub>-TiO<sub>2</sub> Heterojunction Architectonics For Design Of Photovoltaic Devices**

Mohammad Karbalaee Akbari<sup>a\*</sup>, Zhenyin Hai<sup>a</sup>, Zihan Wei<sup>a</sup>, Christophe Detavernier<sup>b</sup>, Eduardo Solano<sup>b,c</sup>, Francis Verpoort<sup>a,d,e</sup>, Serge Zhuiykov<sup>a\*</sup>

<sup>a</sup> Ghent University Global Campus, Faculty of Bioscience Engineering, 119 Songdomunhwa-ro, Yeonsu-gu, 21985 Incheon South Korea

<sup>b</sup> Department of Solid State Sciences, Ghent University, Krijgslaan 281/S1,  
9000 Ghent, Belgium

<sup>c</sup> NCD beamline, ALBA Synchrotron Light Source, Carrer de la Llum, 2-26, 08290 Cerdanyola del Vallès, Spain

<sup>d</sup> National Research Tomsk Polytechnic University, Lenin Avenue 30, 634050 Tomsk, Russian Federation

<sup>e</sup> Laboratory of Organometallics, Catalysis and Ordered Materials, State Key Laboratory of Advanced Technology for Materials Synthesis and Processing; Center for Chemical and Material Engineering, Wuhan University of Technology, 430070 Wuhan, P.R. China

*\*Corresponding Authors: Serge.zhuiykov@ugent.be , Mohammad.akbari@ugent.be*

## S 1. ALD details of TiO<sub>2</sub>

A single cycle of a typical deposition process consisted of: TDMAT plasma / pumping / O<sub>2</sub> plasma / pumping / TDMAT exposure / pumping. The deposition chamber was continuously evacuated by a turbo molecular pump to a base pressure of approx.  $4 \times 10^{-6}$  mbar. Precursor vapors and gases were admitted through computer-controlled pneumatic valves. The flows of TDMAT and O<sub>2</sub> were adjusted to reach a pressure of  $5 \times 10^{-3}$  mbar in the deposition chamber. Initially the reaction chamber was pre-heated to 150°C, whereas TDMAT precursor was kept at 45°C. The precursor delivery facilities included ALD valves and automatic pressure control valves (APC) were kept at 150°C. On top of the chamber, a gate valve leads to a fused quartz column wrapped by a copper coil. The coil was connected to a 13.56 MHz RF generator (ENI GHW-12Z) and a matching network in order to generate an inductively coupled plasma in the column. The remote plasma was generated by feeding vapor or gas from the chamber to the plasma column through the gate valve and pulsing the RF generator. The plasma power was set to 200 W for the TDMAT plasma and 300W for the O<sub>2</sub> plasma, and the impedance matching was tuned to minimize the reflected power on both. All precursors were introduced into the chamber while it was continuously pumped, reaching a partial pressure of  $5 \times 10^{-3}$  mbar in the deposition chamber. The precursor and plasma pulse durations were set to be 1 s and 2 s, respectively. Argon was employed as a precursor carrier gas. The purge time for ALD gas products was setup to be 20 s to bring residual pressures to below  $4 \times 10^{-5}$  mbar, thereby avoiding CVD side reactions. Figure S1 and Table S1 respectively show the schematic drawing of plasma enhanced atomic layer deposition system (PE-ALD) and ALD recipe of 2D TiO<sub>2</sub> films.

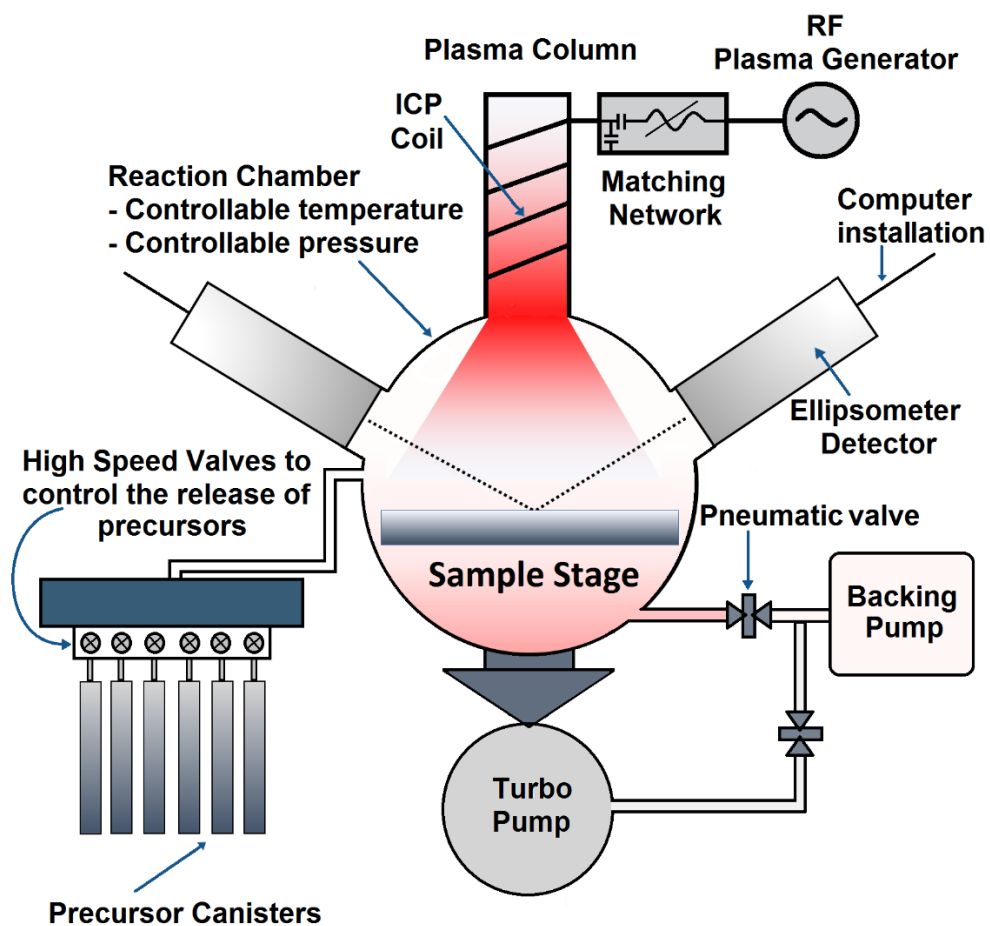

Figure S1. The schematic drawing of plasma enhanced atomic layer deposition system (PEALD).

Table S1. The recipe of PE-ALD process of TiO<sub>2</sub> film.

| Block                        | Delay (S) | Cycle | Total |
|------------------------------|-----------|-------|-------|
| Pretreatment                 | 0         | 1     | 1     |
| Valve to plasma Open/On      | 5         | -     | -     |
| Plasma Pulse                 | 0         | 3     | 3     |
| Gas A to Plasma Open/On      | 2         | -     | -     |
| RF trigger Open/On           | 10        | -     | -     |
| RF trigger Closed/Off        | 0         | -     | -     |
| Gas A to Plasma Closed/Off   | 5         | -     | -     |
| Valve to plasma Closed/Off   | 5         | -     | -     |
| ALD Cycle                    | 0         | 10    | 100   |
| TDMAT Open/On                | 1         | -     | -     |
| Ar to precursors, Open/On    | 10        | -     | -     |
| Ar to precursors, Closed/Off | 0         | -     | -     |
| TDMAT Closed/Off             | 20        | -     | -     |
| Valve To Plasma Open/On      | 2         | -     | -     |
| Gas A to plasma open/On      | 1         | -     | -     |
| RF trigger Open/On           | 10        | -     | -     |
| RF trigger Closed/Off        | 0         | -     | -     |
| Gas A to Plasma Closed/Off   | 5         | -     | -     |
| Valve to Plasma Closed/Off   | 10        | -     | -     |

## S 2. ALD details of WO<sub>3</sub>

In ALD process of WO<sub>3</sub> the utilization of glove-box with Ar gas allowed to minimize the exposure of deposited nanostructured films to moisture when unloading them from the reactor.

Table S2. The recipe of PE-ALD process of WO<sub>3</sub> monolayer film.

| Block                                             | Details   | Cycle | Total |
|---------------------------------------------------|-----------|-------|-------|
| Residual flow                                     | 10 sccm   | 0     | -     |
| Trap temperature                                  | 150°C     | 6     | -     |
| Exhaust line temperature                          | 150°C     | 7     | -     |
| ALD valves temperature                            | 150°C     | 10    | -     |
| Chamber temperature                               | 280°C     | 8     | -     |
| Chamber temperature                               | 280°C     | 9     | -     |
| Temperature of tungsten precursor                 | 80°C      | 12    | -     |
| Stabilize heater                                  | 46 sec    | -     | -     |
| Manifold process flow                             | 20 sccm   | 0     | -     |
| Wait for substrate to reach temperature           | 2400 sec  | -     | -     |
| Start H <sub>2</sub> O exposure step, cycle start | -         | -     | -     |
| Reduce flow                                       | 10 sccm   | 0     | -     |
| H <sub>2</sub> O pulse                            | 0.015 sec | -     | -     |
| H <sub>2</sub> O exposure step                    | 5 sec     | -     | -     |
| End H <sub>2</sub> O exposure step                | -         | -     | -     |
| Increase flow                                     | 20 sccm   | 0     | -     |
| Purge H <sub>2</sub> O                            | 12 sec    | -     | -     |
| Start Tungsten exposure step                      | -         | -     | -     |
| Reduce flow                                       | 10 sccm   | 0     | -     |
| Tungsten Pulse                                    | 1 sec     | 2     | -     |
| End Tungsten exposure step                        | -         | -     | -     |
| Increase flow                                     | 20 sccm   | 0     | -     |
| Purge Tungsten                                    | 14 sec    | -     | -     |
| End of cycle                                      | -         | -     | -     |

### S. 3. The graphical scheme of fabricated ALD 2D films

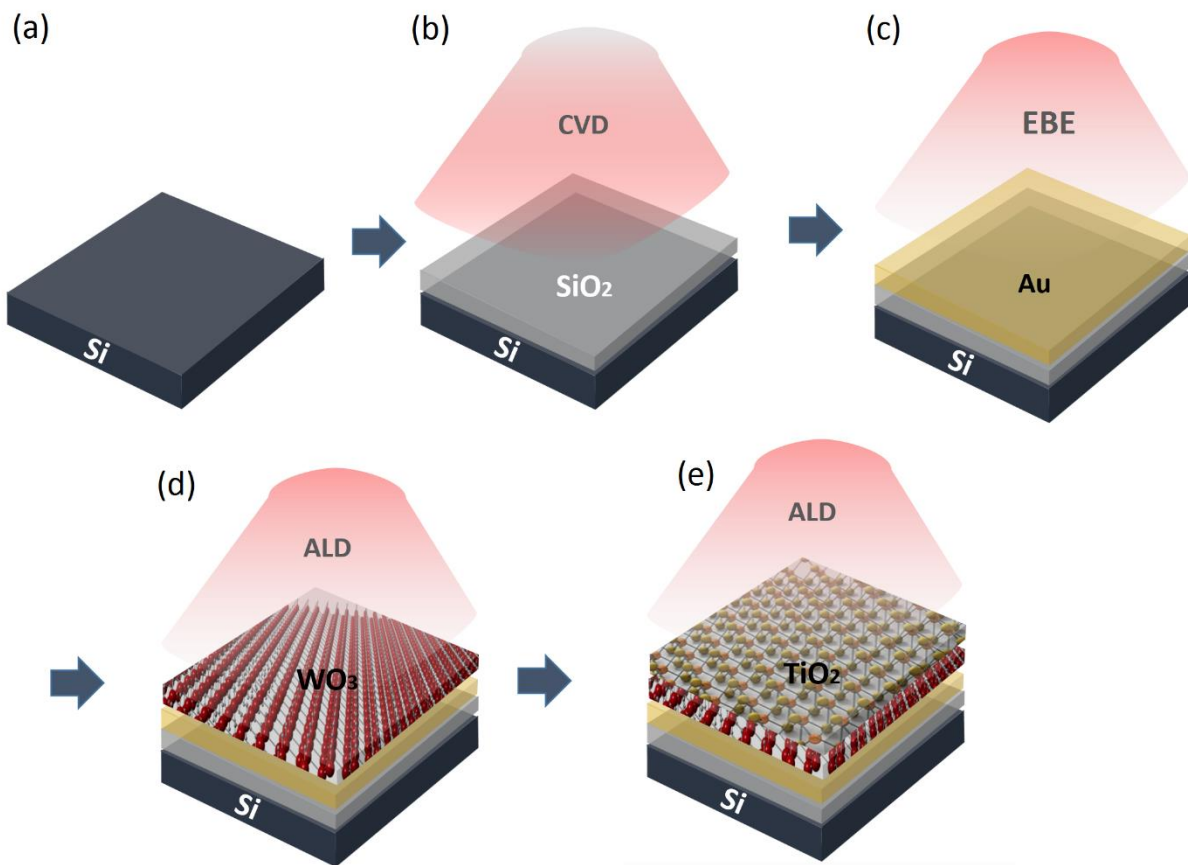

Figure S2. The graphical scheme of developed heterojunction samples, (a) bare Si substrate, (b) CVD of SiO<sub>2</sub> on Si substrate, (c) EB deposition of Au film on SiO<sub>2</sub> film, (d) ALD of WO<sub>3</sub> on Au film, (e) ALD of TiO<sub>2</sub> on WO<sub>3</sub> film.

#### S. 4. XRD pattern of Au substrate

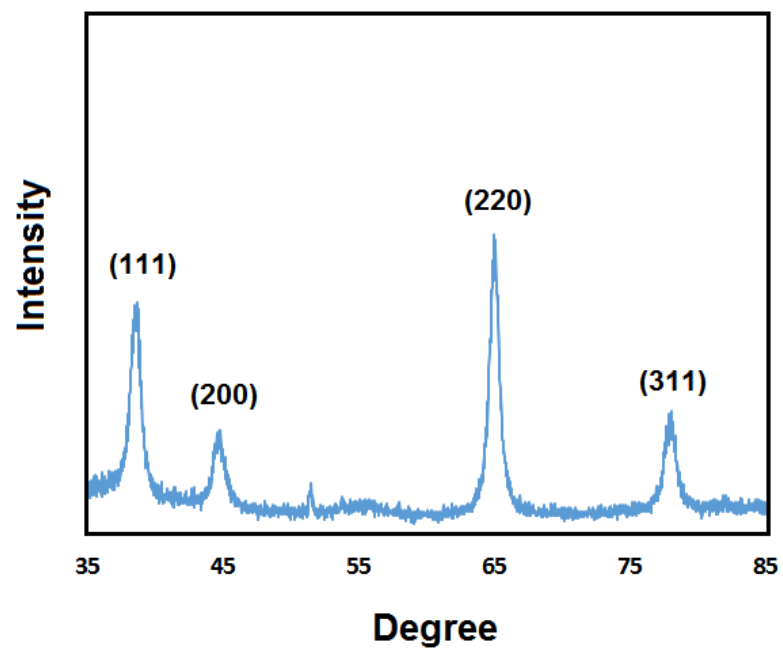

Figure S3. The X-ray diffraction pattern of non-coated EBE developed Au substrate.

## S. 5. Spectroscopic analysis and AFM measurements of Si/SiO<sub>2</sub>-TiO<sub>2</sub>

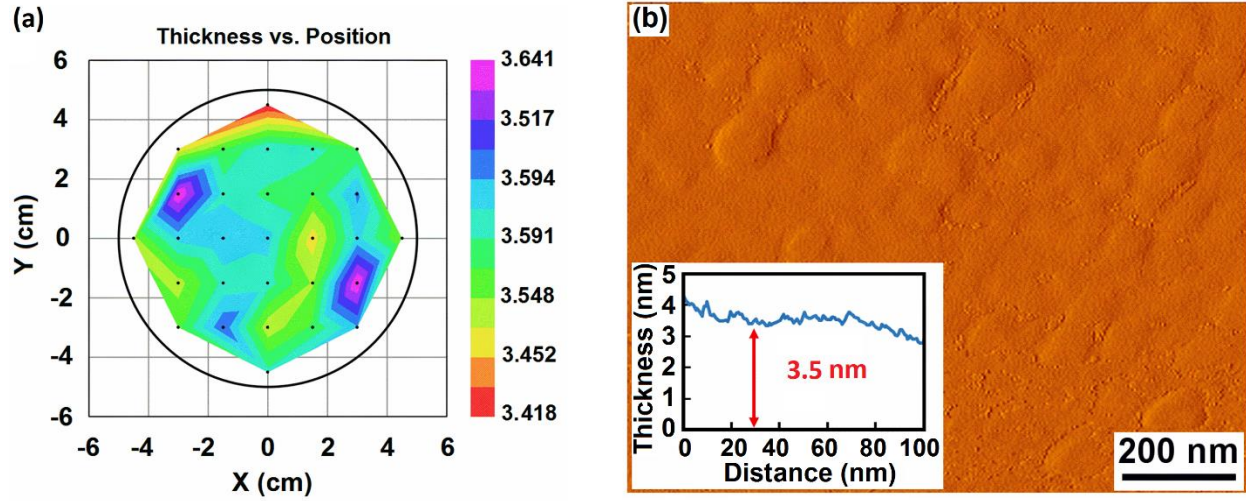

Figure S4. (a) The spectroscopic map of 3.5 nm thick 2D TiO<sub>2</sub> film deposited on Si/SiO<sub>2</sub> substrate, and its (b) AFM image and thickness measurement.



## S. 6. The XPS of Au-TiO<sub>2</sub> films

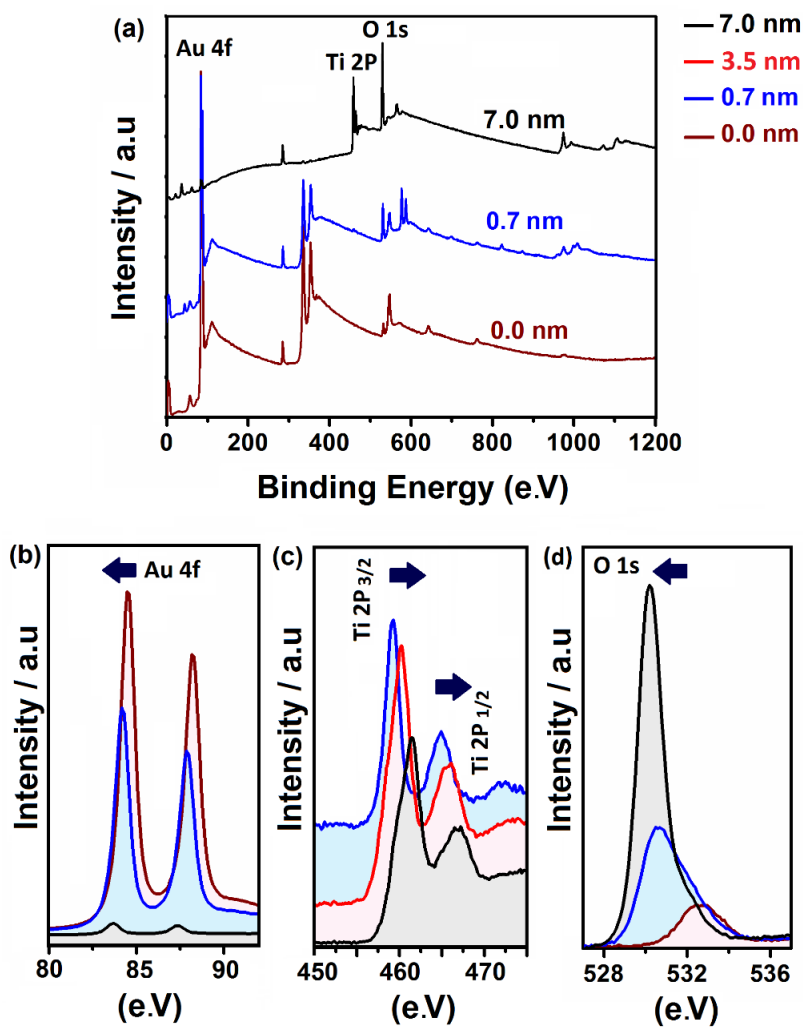

Figure S4.

Figure S5. The XPS spectra of (a) Au bare film and Au-TiO<sub>2</sub> samples, accompanied by the detailed core level of (b) Au 4f, (c) Ti 2p and (d) O 1s spectra.

### S. 7. Raman and FTIR spectra of 2D WO<sub>3</sub> film

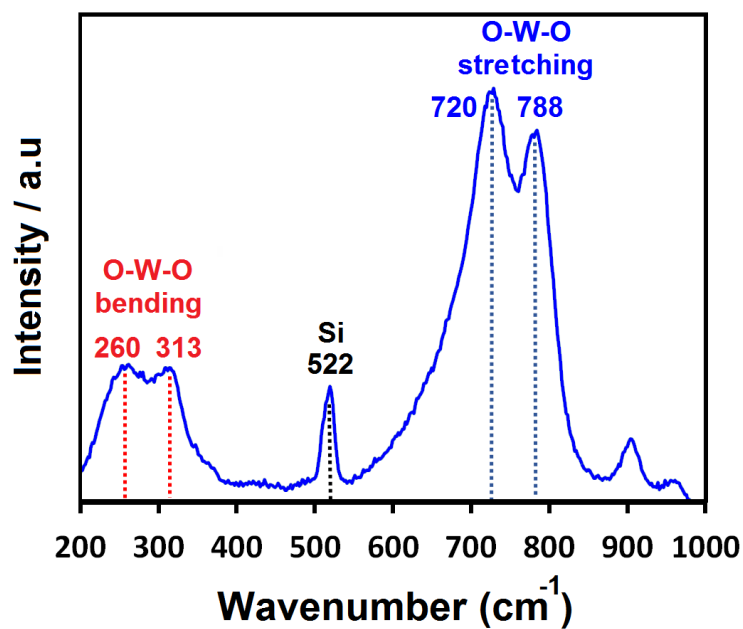

Figure S6. The Raman spectra of 2D WO<sub>3</sub> film, before the deposition of upper 2D TiO<sub>2</sub> films.

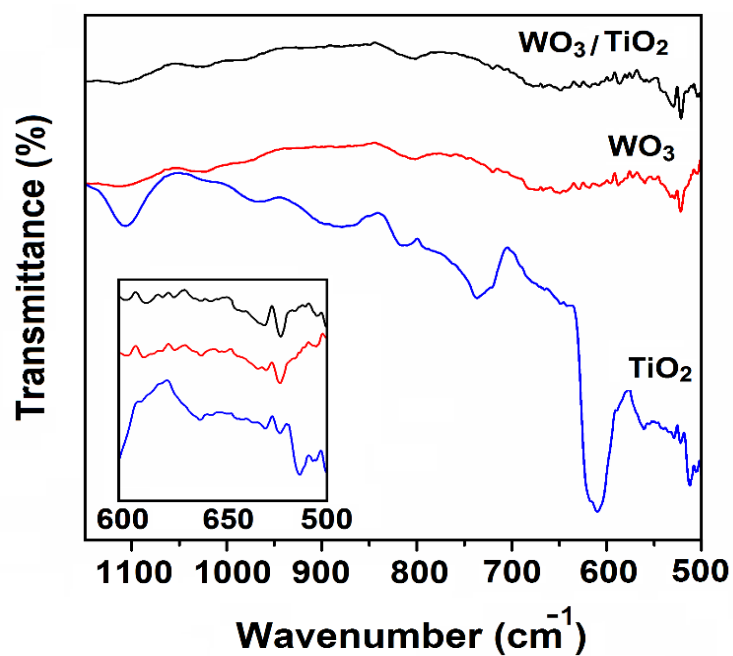

Figure S7. The FTIR spectra of 2D WO<sub>3</sub>/TiO<sub>2</sub> heterojunction.

## S. 8. The Nyquist plot of photodetectors

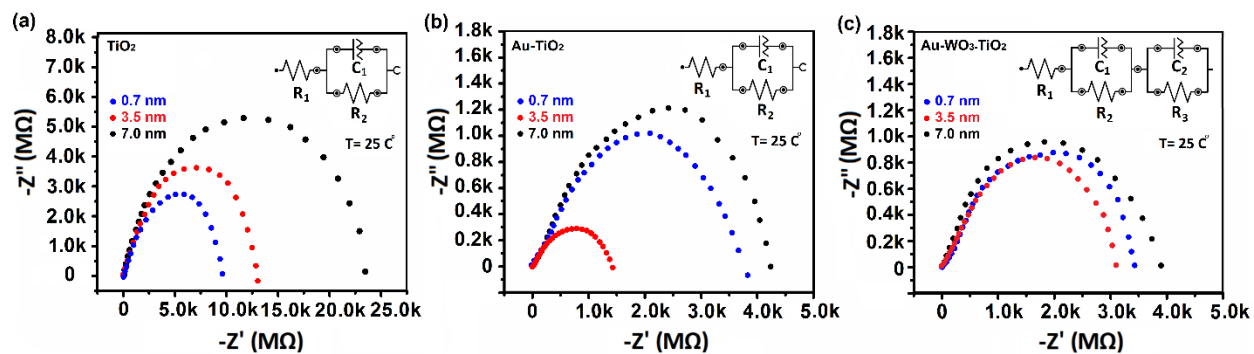

Figure S8. The Nyquist plot of (a)  $\text{TiO}_2$ , (b)  $\text{Au-TiO}_2$  and (c)  $\text{Au-WO}_3\text{-TiO}_2$  devices with various

$\text{TiO}_2$  thickness, tested under  $\lambda = 785\text{ nm}$  laser light illumination with power density of 20

$\text{mV/cm}^2$ .

## S. 9. The photo-responsivity and EQE

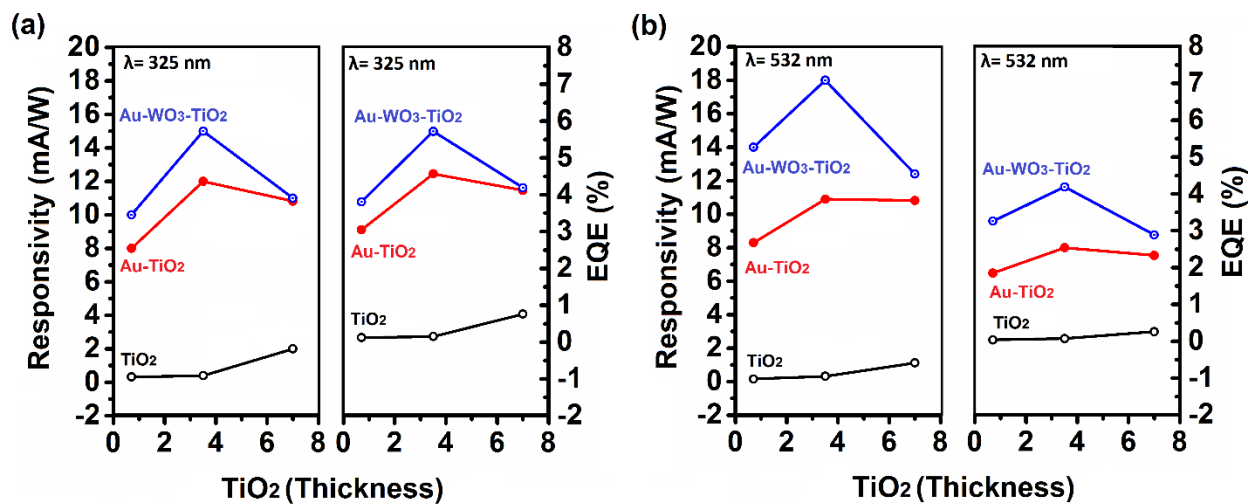

Figure S9. The photo-responsivity and EQE of 2D TiO<sub>2</sub>, Au-TiO<sub>2</sub> and Au-WO<sub>3</sub>-TiO<sub>2</sub> photodetectors under (a)  $\lambda = 325$  nm and (b)  $\lambda = 532$  nm laser light with the power density of 5 mV/cm<sup>2</sup>.

## S. 10. The response and recovery time

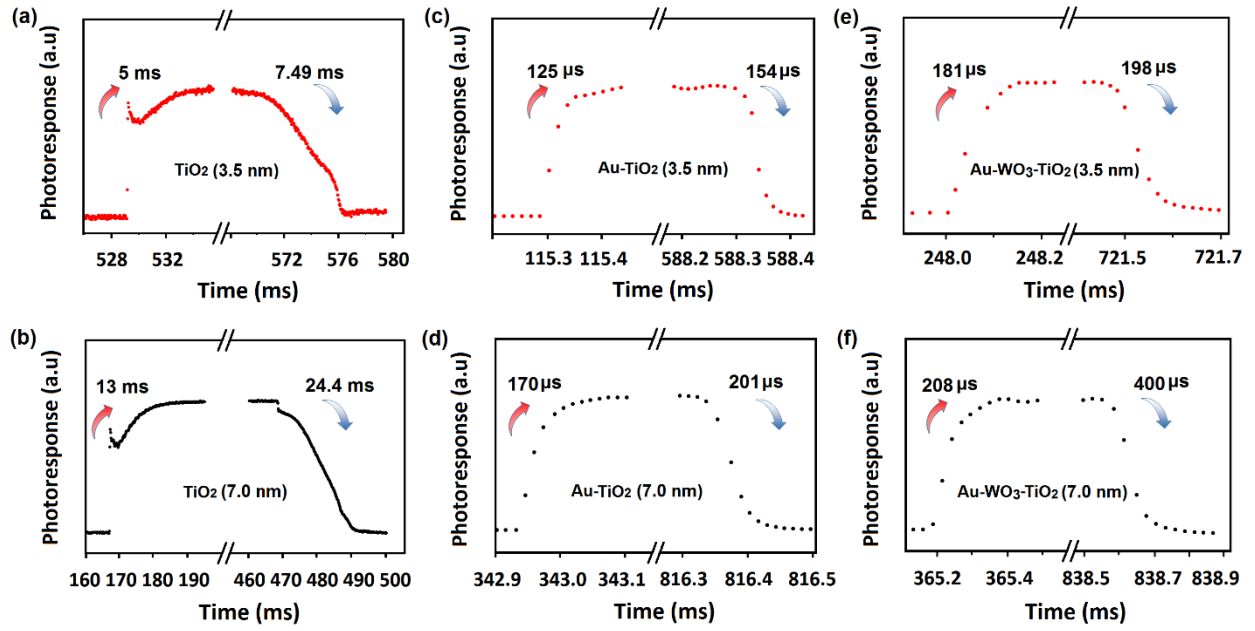

Figure S10. The response and recovery time of photoelectrode devices with different thickness of  $\text{TiO}_2$  semiconductor film: (a)  $\text{TiO}_2$  (3.5 nm), (b)  $\text{TiO}_2$  (7.0 nm), (c)  $\text{Au-TiO}_2$  (3.5 nm), (d)  $\text{Au-TiO}_2$  (7.0 nm), (e)  $\text{Au-WO}_3\text{-TiO}_2$  (3.5 nm), and (f)  $\text{Au-WO}_3\text{-TiO}_2$  (7.0 nm) photodetectors tested under  $\lambda = 785$  nm laser light illumination with power density of  $20 \text{ mW/cm}^2$  at  $V_G = 0 \text{ V}$  and  $V_{DS} = 1 \text{ V}$ . The numbers in parentheses show the thickness of 2D  $\text{TiO}_2$  film.
